# Supplementary material
Source: Springer Nature journal article supplement (https://www.springermedizin.de/resource/supplementary/12936_2012_2511_MOESM4_ESM.pdf/9543116)

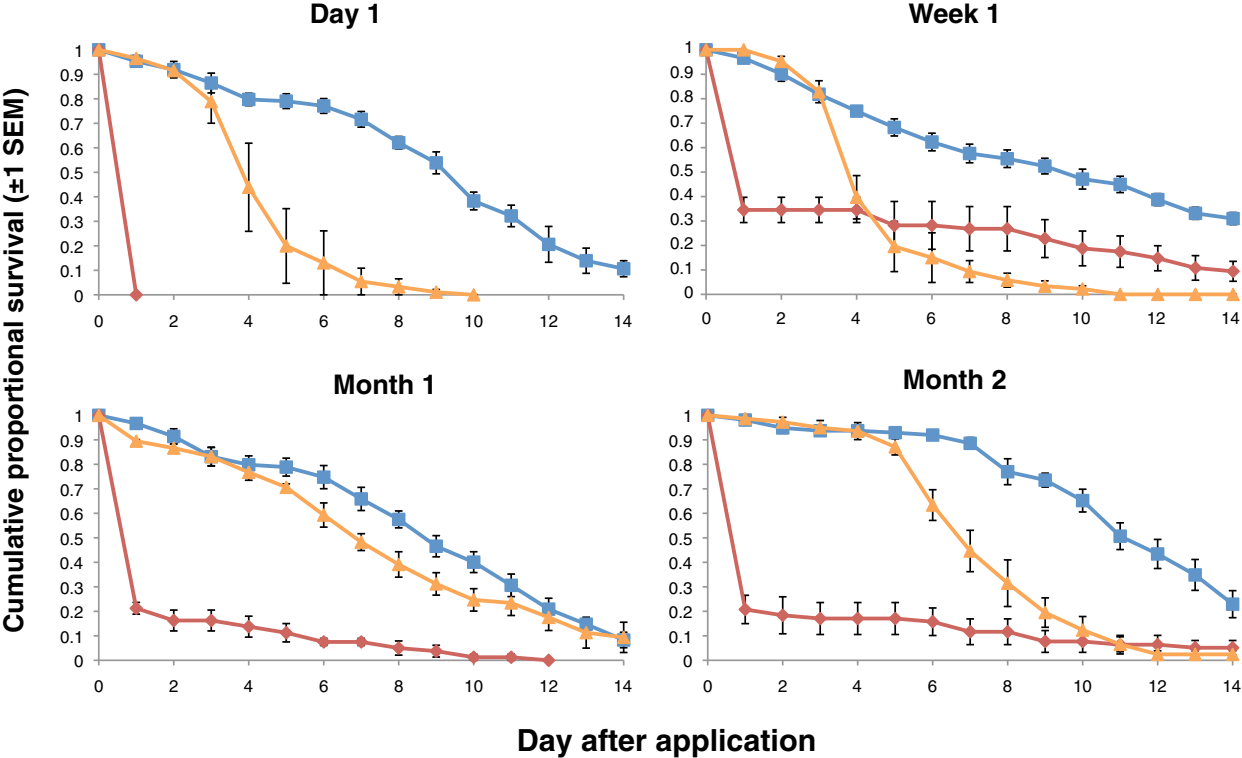

Supplement: MOESM4 [file 9543116]
